# Supplementary material for: Optimization and Development of Selective Histone Deacetylase Inhibitor (MPT0B291)-Loaded Albumin Nanoparticles for Anticancer Therapy
Source: MDPI journal article supplement (doi:10.3390/pharmaceutics13101728), 2021-10-19
Supplement: s1 [file s1]

# Supplementary Materials: Optimization and Development of Selective Histone Deacetylase Inhibitor (MPT0B291)-Loaded Albumin Nanoparticles for Anticancer Therapy

Athika Darumas Putri, Pai-Shan Chen, Yu-Lin Su, Jia-Pei Lin, Jing-Ping Liou and Chien-Ming Hsieh

**Table 1.** The 50% inhibitory concentration (IC<sub>50</sub>) of free MPT0B291 and MPT0B291-human serum albumin (HSA) nanoparticles (NPs).

| Group            | IC <sub>50</sub> (μM) |
|------------------|-----------------------|
| Free MPT0B291    | 4.71                  |
| MPT0B291-HSA NPs | 4.28                  |
